# Supplementary material for: Plastome sequences help to improve the systematic position of trinerved Lindera species in the family Lauraceae
Source: PeerJ. 2019 Oct 7;7:e7662. doi: 10.7717/peerj.7662 (PMC6786250; doi:10.7717/peerj.7662)
Supplement: Supplemental Information 2 — Appendix S1 List and accession number of 49 taxa for complete plastid genome phylogenetic analysis Appendix S2 The repeats distribution in the plastid genome sequences of Lindera species (Note: F, P, R, and C represent forward, palindrome, reverse, and complement type repeat sequences in the plastome.) Appendix S3 The mutations and Indels distribution in the plastid genome sequences of Lindera species [file peerj-07-7662-s002.xlsx]

## Sheet: Appendix S1
Table S1 List and accession number of 49 taxa for complete chloroplast genome phylogenetic analysis
Clades	Genus	species	Accession number	Note
Core Lauraceae	Actinodaphne	Actinodaphne trichocarpa	MF939342	NCBI
	Alseodaphne	Alseodaphne gracilis	MG407593	NCBI
		Alseodaphne huanglianshanensis	MG407594	NCBI
		Alseodaphne semecarpifolia	MG407595	NCBI
	Cinnamomum	Cinnamomum camphora	LC228240	NCBI
		Cinnamomum kanehirae	KR014245	NCBI
		Cinnamomum micranthum	KT833081	NCBI
		Cinnamomum verum	KY635878	NCBI
	Iteadaphne	Iteadaphne caudata	LAU00055	LCGDB
	Laurus	Laurus nobilis	KY085912	NCBI
	Lindera	Lindera aggregata	LAU00079	LCGDB
		Lindera benzoin	LAU00031	LCGDB
		Lindera chunii	LAU00080	LCGDB
		Lindera communis	LAU00027	LCGDB
		Lindera fragrans	LAU00088	LCGDB
		Lindera glauca	MF188124	NCBI
		Lindera glauca	LAU00030	LCGDB
		Lindera latifolia	LAU00026	LCGDB
		Lindera limprichtii	LAU00081	LCGDB
		Lindera megaphylla	LAU00029	LCGDB
		Lindera metcalfiana	LAU00024	LCGDB
		Lindera nacusua	LAU00032	LCGDB
		Lindera obtusiloba	LAU00028	LCGDB
		Lindera obtusiloba	LAU00083	LCGDB
		Lindera pulcherrima	LAU00082	LCGDB
		Lindera robusta	LAU00025	LCGDB
		Lindera supracostata	LAU00084	LCGDB
		Lindera thomsonii BOP	LAU00085	LCGDB
		Lindera thomsonii SY	LAU00086	LCGDB
		Lindera thomsonii var. vernayana	LAU00087	LCGDB
	Litsea	Litsea glutinosa	KU382356	NCBI
		Litsea glutinosa	LAU00058	LCGDB
		Litsea monopetala	LAU00063	LCGDB
		Litsea tsinlingensis	LAU00059	LCGDB
	Machilus	Machilus balansae	KT348517	NCBI
		Machilus pauhoi	MH178403	NCBI
		Machilus thunbergii	MH178404	NCBI
		Machilus yunnanensis	KT348516	NCBI
	Nectandra	Nectandra angustifolia	MF939340	NCBI
	Neolitsea	Neolitsea sericea	MF939341	NCBI
	Parasassafras	Parasassafras confertiflorum	LAU00033	LCGDB
	Persea	Persea americana	KX437771	NCBI
	Phoebe	Phoebe chekiangensis	KY346511	NCBI
		Phoebe omeiensis	KX437772	NCBI
		Phoebe sheareri	KX437773	NCBI
		Phoebe zhennan	KY346512	NCBI
	Sassafras	Sassafras tzumu	MF939339	NCBI
Outgroup	Endiandra	Endiandra discolour	KT588615	NCBI
		Endiandra globosa	KT588614	NCBI

## Sheet: Appendix S2
Table S2 The repeats distribution in the plastid genome sequences of Lindera species (Note: F, P, R, C represents forward, palindrome, reverse, complement type repeat sequences in the plastome. )
Table S2-1. The repeats distribution in Lindera aggregata chloroplast genome							Table S2-2. The repeats distribution in Lindera chunii chloroplast genome							Table S2-3. The repeats distribution in Lindera fragran chloroplast genome							Table S2-4. The repeats distribution in Lindera limprichtii chloroplast genome							Table S2-5. The repeats distribution in Lindera obtusiloba chloroplast genome							Table S2-6. The repeats distribution in Lindera pulcherrima chloroplast genome							Table S2-7. The repeats distribution in Lindera supracostata chloroplast genome							Table S2-8. The repeats distribution in Lindera thomsonii_BOP chloroplast genome
Repeat length (bp)	Start locus A	type	Start locus B	Repeat A location	Repeat B location		Repeat length (bp)	Start locus A	type	Start locus B	Repeat A location	Repeat B location		Repeat length (bp)	Start locus A	type	Start locus B	Repeat A location	Repeat B location		Repeat length (bp)	Start locus A	type	Start locus B	Repeat A location	Repeat B location		Repeat length (bp)	Start locus A	type	Start locus B	Repeat A location	Repeat B location		Repeat length (bp)	Start locus A	type	Start locus B	Repeat A location	Repeat B location		Repeat length (bp)	Start locus A	type	Start locus B	Repeat A location	Repeat B location		Repeat length (bp)
30	9403	P	47580	psbI/trnS-GCU	trnS-GGA		30	67464	P	67510	petA/psbJ	petA/psbJ		30	9371	P	47547	psbI/trnS-GCU	trnS-GGA		30	67492	P	67538	petA/psbJ	petA/psbJ		30	11081	F	38700	trnG-UCC	trnG-UCC		32	9404	F	37842	psbI/trnS-GCU	psbC/trnS-UGA		30	9372	P	47543	psbI/trnS-GCU	trnS-GGA		32
30	11111	F	38768	trnG-UCC	trnG-UCC		30	9384	P	47551	psbI/trnS-GCU	trnS-GGA		30	11086	F	38729	trnG-UCC	trnG-UCC		30	9404	P	47579	psbI/trnS-GCU	trnS-GGA		30	33216	F	39329	trnE-UUC/trnT-GGU	rps14		30	9406	P	47576	psbI/trnS-GCU	trnS-GGA		30	11087	F	38725	trnG-UCC	trnG-UCC		30
30	33326	F	68783	trnE-UUC/trnT-GGU	psbE/petL		30	102126	R	102126	rps7/trnV-GAC	rps7/trnV-GAC		30	33255	F	39362	trnE-UUC/trnT-GGU	rps14		30	102134	R	102134	rps7/trnV-GAC	rps7/trnV-GAC		30	45833	F	101702	ycf3 intron	rps7/rnV-GAC		30	11121	F	38764	trnG-UCC	trnG-UCC		30	33252	F	39358	trnE-UUC/trnT-GGU	rps14		30
30	37848	P	47580	psbC/trnS-UGA	trnS-GGA		30	102126	C	144294	rps7/trnV-GAC	trnV-GAC/rps7		30	33293	F	68765	trnE-UUC/trnT-GGU	psbE/petL		30	102134	C	144280	rps7/trnV-GAC	trnV-GAC/rps7		30	45833	P	144622	ycf3 intron	trnV-GAC/rps7		30	33291	F	39391	trnE-UUC/trnT-GGU	rps14		30	37805	P	47543	psbC/trnS-UGA	trnS-GGA		30
30	40979	F	43203	psaB	psaA		30	102130	R	102130	rps7/trnV-GAC	rps7/trnV-GAC		30	37809	P	47547	psbC/trnS-UGA	trnS-GGA		30	102138	R	102138	rps7/trnV-GAC	rps7/trnV-GAC		30	67361	P	67407	petA/psbJ	petA/psbJ		30	33328	F	68785	trnE-UUC/trnT-GGU	psbE/petL		30	45863	F	101763	ycf3 intron	rps7/trnV-GAC		31
30	45901	F	101822	ycf3	rps7/trnV-GAC		30	102130	C	144290	rps7/trnV-GAC	trnV-GAC/rps7		30	45867	F	101746	ycf3 intron	rps7/trnV-GAC		30	102138	C	144276	rps7/trnV-GAC	trnV-GAC/rps7		30	102023	R	102023	rps7/rnV-GAC	rps7/rnV-GAC		30	37844	P	47576	psbC/trnS-UGA	trnS-GGA		30	45863	P	144567	ycf3 intron	trnV-GAC/rps7		30
30	45901	P	144598	ycf3	trnV-GAC/rps7		30	119474	P	119474	ccsA	ccsA		30	45867	P	144549	ycf3 intron	trnV-GAC/rps7		30	119478	P	119478	ccsA	ccsA		30	102023	C	144301	rps7/rnV-GAC	trnV-GAC/rps7		41	40974	F	43198	psaB	psaA		30	48493	R	128145	rps4	rps15/ycf1		41
30	53125	F	53127	ndhC/trnV-UAC	ndhC/trnV-UAC		30	144290	R	144290	trnV-GAC/rps7	trnV-GAC/rps7		30	48498	R	128127	rps4	rps15/ycf1		30	144276	R	144276	trnV-GAC/rps7	trnV-GAC/rps7		30	102027	R	102027	rps7/rnV-GAC	rps7/rnV-GAC		39	45883	F	101779	ycf3 intron	rps7/trnV-GAC		30	67443	P	67489	petA/psbJ	petA/psbJ		39
30	67469	P	67515	petA/psbJ	petA/psbJ		30	144294	R	144294	trnV-GAC/rps7	trnV-GAC/rps7		30	67450	P	67496	petA/psbJ	petA/psbJ		30	144280	R	144280	trnV-GAC/rps7	trnV-GAC/rps7		30	102027	C	144297	rps7/rnV-GAC	trnV-GAC/rps7		39	45883	P	144601	ycf3 intron	trnV-GAC/rps7		30	102084	R	102084	rps7/trnV-GAC	rps7/rnV-GAC		39
30	102143	R	102143	rps7/trnV-GAC	rps7/trnV-GAC		30	11087	F	38741	trnG-UCC	trnG-UCC		30	102067	R	102067	rps7/trnV-GAC	rps7/rnV-GAC		30	11119	F	38768	trnG-UCC	trnG-UCC		30	144297	R	144297	trnV-GAC/rps7	trnV-GAC/rps7		30	45895	F	101791	ycf3 intron	rps7/trnV-GAC		30	102084	C	144246	rps7/trnV-GAC	trnV-GAC/rps7		30
30	102143	C	144277	rps7/trnV-GAC	trnV-GAC/rps7		30	33273	F	39367	trnE-UUC/trnT-GGU	rps14		30	102067	C	144228	rps7/trnV-GAC	trnV-GAC/rps7		30	33296	F	39394	trnE-UUC/trnT-GGU	rps14		30	144301	R	144301	trnV-GAC/rps7	trnV-GAC/rps7		30	45895	P	144598	ycf3 intron	trnV-GAC/rps7		30	102088	R	102088	rps7/trnV-GAC	rps7/trnV-GAC		30
30	119482	P	119482	ccsA	ccsA		30	37821	P	47551	psbC/trnS-UGA	trnS-GGA		30	102071	R	102071	rps7/trnV-GAC	rps7/trnV-GAC		30	33333	F	68808	trnE-UUC/trnT-GGU	psbE/petL		31	9384	P	47507	psbI/trnS-GCU	trnS-GGA		30	48525	R	128176	trnS-GGA/rps4	rps15/ycf1		30	102088	C	144242	rps7/trnV-GAC	trnV-GAC/rps7		30
30	144277	R	144277	trnV-GAC/rps7	trnV-GAC/rps7		30	45868	F	101805	ycf3 intron	rps7/trnV-GAC		30	102071	C	144224	rps7/trnV-GAC	trnV-GAC/rps7		30	37848	P	47579	psbC/trnS-UGA	trnS-GGA		31	33253	F	68673	trnE-UUC/trnT-GGU	psbE/petL		31	49339	F	49349	trnT-UGU/trnL-UAA	trnT-UGU/trnL-UAA		30	119448	P	119448	ccsA	ccsA		30
31	47830	F	47831	trnS-GGA/rps4	trnS-GGA/rps4		30	45868	P	144615	ycf3 intron	trnV-GAC/rps7		30	119431	P	119431	ccsA	ccsA		30	45898	F	101813	ycf3 intron	rps7/trnV-GAC		31	53025	F	53027	ndhC/trnV-UAC	ndhC/trnV-UAC		38	49339	R	49339	trnT-UGU/trnL-UAA	trnT-UGU/trnL-UAA		30	144242	R	144242	trnV-GAC/rps7	trnV-GAC/rps7		48
32	9401	F	37846	psbI/trnS-GCU	psbC/trnS-UGA		30	48501	R	128173	rps4/trnT-UGU	rps15/ycf1		30	144224	R	144224	trnV-GAC/rps7	trnV-GAC/rps7		30	45898	P	144601	ycf3 intron	trnV-GAC/rps7		32	9381	F	37778	psbI/trnS-GCU	psbC/trnS-UGA		34	49346	R	49346	trnT-UGU/trnL-UAA	trnT-UGU/trnL-UAA		30	144246	R	144246	trnV-GAC/rps7	trnV-GAC/rps7		34
33	95061	F	95109	ycf2	ycf2		31	53110	F	53112	ndhC/trnV-UAC	ndhC/trnV-UAC		30	144228	R	144228	trnV-GAC/rps7	trnV-GAC/rps7		30	48530	R	128178	rps4/trnT-UGU	rps15/ycf1		32	38854	R	38854	trnG-UCC/trnfM-CAU	trnG-UCC/trnfM-CAU		30	67469	P	67515	petA/psbJ	petA/psbJ		31	33288	F	68757	trnE-UUC/trnT-GGU	psbE/petL		34
33	95061	P	151308	ycf2	ycf2		32	9382	F	37819	psbI/trnS-GCU	psbC/trnS-UGA		32	9369	F	37807	psbI/trnS-GCU	psbC/trnS-UGA		31	49345	F	49355	trnT-UGU/trnL-UAA	trnT-UGU/trnL-UAA		33	94965	F	94989	ycf2	ycf2		48	77924	P	77924	psbT/psbN	psbT/psbN		32	9370	F	37803	psbI/trnS-GCU	psbC/trnS-UGA		33
33	95109	P	151356	ycf2	ycf2		33	95044	F	95092	ycf2	ycf2		33	95009	F	95033	ycf2	ycf2		32	9402	F	37846	psbI/trnS-GCU	psbC/trnS-UGA		33	94965	P	151332	ycf2	ycf2		35	87003	F	87009	rps3/rps19	rps3/rps19		33	95026	F	95050	ycf2	ycf2		33
33	97216	P	97216	ycf2/trnL-CAA	ycf2/trnL-CAA		33	95044	P	151325	ycf2	ycf2		33	95009	P	151259	ycf2	ycf2		33	95076	F	95100	ycf2	ycf2		33	94989	P	151356	ycf2	ycf2		37	87003	F	87007	rps3/rps19	rps3/rps19		33	95026	P	151277	ycf2	ycf2		33
33	97216	F	149201	ycf2/trnL-CAA	trnL-CAA/ycf2		33	95092	P	151373	ycf2	ycf2		33	95033	P	151283	ycf2	ycf2		33	95076	P	151311	ycf2	ycf2		33	97096	P	97096	ycf2/trnL-CAA	ycf2/trnL-CAA		39	87003	F	87005	rps3/rps19	rps3/rps19		33	95050	P	151301	ycf2	ycf2		33
33	149201	P	149201	trnL-CAA/ycf2	trnL-CAA/ycf2		33	151325	F	151373	ycf2	ycf2		33	97140	P	97140	ycf2/trnL-CAA	ycf2/trnL-CAA		33	95100	P	151335	ycf2	ycf2		33	97096	F	149225	ycf2/trnL-CAA	trnL-CAA/ycf2		31	87007	F	87015	rps3/rps19	rps3/rps19		33	97157	P	97157	ycf2/trnL-CAA	ycf2/trnL-CAA		33
33	151308	F	151356	ycf2	ycf2		33	97199	P	97199	ycf2/trnL-CAA	ycf2/trnL-CAA		33	97140	F	149152	ycf2/trnL-CAA	trnL-CAA/ycf2		33	151311	F	151335	ycf2	ycf2		33	149225	P	149225	trnL-CAA/ycf2	trnL-CAA/ycf2		31	87009	R	87011	rps3/rps19	rps3/rps19		33	97157	F	149170	ycf2/trnL-CAA	trnL-CAA/ycf2		30
34	87882	F	93767	rps19/rpl2	ycf2		33	97199	F	149218	ycf2/trnL-CAA	trnL-CAA/ycf2		33	149152	P	149152	trnL-CAA/ycf2	trnL-CAA/ycf2		33	97207	P	97207	ycf2/trnL-CAA	ycf2/trnL-CAA		33	151332	F	151356	ycf2	ycf2		31	87011	R	87011	rps3/rps19	rps3/rps19		33	149170	P	149170	trnL-CAA/ycf2	trnL-CAA/ycf2		30
34	87882	P	152649	rps19/rpl2	ycf2		33	149218	P	149218	trnL-CAA/ycf2	trnL-CAA/ycf2		33	151259	F	151283	ycf2	ycf2		33	97207	F	149204	ycf2/trnL-CAA	trnV-GAC/rps7		34	87781	F	93671	rps19/rpl2	ycf2		31	87011	F	87013	rps3/rps19	rps3/rps19		33	151277	F	151301	ycf2	ycf2		30
35	132598	F	132616	ycf1	ycf1		34	87867	F	93750	rps19/rpl2	ycf2		34	87854	F	93715	rps19/rpl2	ycf2		33	149204	P	149204	trnV-GAC/rps7	trnV-GAC/rps7		34	87781	P	152649	rps19/rpl2	ycf2		33	87011	R	87011	rps3/rps19	rps3/rps19		34	87846	F	93732	rps19/rpl2	ycf2		30
39	45889	F	101810	ycf3	rps7/trnV-GAC		34	87867	P	152666	rps19/rpl2	ycf2		34	87854	P	152576	rps19/rpl2	ycf2		34	49352	R	49352	trnT-UGU/trnL-UAA	trnT-UGU/trnL-UAA		34	113687	P	132615	ycf1	ycf1		31	87013	R	87013	rps3/rps19	rps3/rps19		34	87846	P	152594	rps19/rpl2	ycf2		30
39	45889	P	144601	ycf3	trnV-GAC/rps7		35	132606	F	132624	ycf1	ycf1		39	45855	F	101734	ycf3 intron	rps7/trnV-GAC		34	87897	F	93782	rps19/rps12	ycf2		36	132613	F	132631	ycf1	ycf1		31	87013	R	87015	rps3/rps19	rps3/rps19		39	45851	F	101751	ycf3 intron	rps7/trnV-GAC		35
48	77926	P	77926	psbT/psbN	psbT/psbN		36	50695	F	50713	trnF-GAA/ndhJ	trnF-GAA/ndhJ		39	45855	P	144552	ycf3 intron	trnV-GAC/rps7		34	87897	P	152628	rps19/rps12	ycf2		39	45821	F	101690	ycf3 intron	rps7/rnV-GAC		31	87015	R	87015	rps3/rps19	rps3/rps19		39	45851	P	144570	ycf3 intron	trnV-GAC/rps7		30
57	95061	F	95085	ycf2	ycf2		39	45856	F	101793	ycf3 intron	rps7/trnV-GAC		41	40945	F	43169	psaB	psaA		38	49345	R	49345	trnT-UGU/trnL-UAA	trnT-UGU/trnL-UAA		39	45821	P	144625	ycf3 intron	trnV-GAC/rps7		34	87876	F	93759	rps19/rpl2	ycf2		41	40941	F	43165	psaB	psaA		30
57	95061	P	151308	ycf2	ycf2		39	45856	P	144618	ycf3 intron	trnV-GAC/rps7		48	77902	P	77902	psbT/psbN	psbT/psbN		39	45886	F	101801	ycf3 intron	rps7/trnV-GAC		41	40912	F	43136	psaB	psaA		34	87876	P	152625	rps19/rpl2	ycf2		48	77895	P	77895	psbT/psbN	psbT/psbN		33
57	95085	P	151332	ycf2	ycf2		41	40950	F	43174	psaB	psaA									39	45886	P	144604	ycf3 intron	trnV-GAC/rps7		48	77826	P	77826	psbT/psbN	psbT/psbN		33	95078	P	151332	ycf2	ycf2									33
57	151308	F	151332	ycf2	ycf2		48	77908	P	77908	psbT/psbN	psbT/psbN									41	40976	F	43200	psaB	psaA									33	97185	P	97185	ycf2/trnL-CAA	ycf2/trnL-CAA
							57	95044	F	95068	ycf2	ycf2									48	77947	P	77947	psbT/psbN	psbT/psbN									33	97185	F	149201	ycf2/trnL-CAA	trnL-CAA/ycf2
							57	95044	P	151325	ycf2	ycf2																							30	102112	R	102112	rps7/trnV-GAC	rps7/trnV-GAC
							57	95068	P	151349	ycf2	ycf2																							30	102112	C	144277	rps7/trnV-GAC	trnV-GAC/rps7
							57	151325	F	151349	ycf2	ycf2																							30	102116	R	102116	rps7/trnV-GAC	rps7/trnV-GAC
																																			30	102116	C	144273	rps7/trnV-GAC	trnV-GAC/rps7
																																			30	119478	P	119478	ccsA	ccsA
																																			35	132589	F	132607	ycf1	ycf1
																																			30	144273	R	144273	trnV-GAC/rps7	trnV-GAC/rps7
																																			30	144277	R	144277	trnV-GAC/rps7	trnV-GAC/rps7
																																			33	149201	P	149201	trnL-CAA/ycf2	trnL-CAA/ycf2
																																			33	151308	F	151332	ycf2	ycf2
[truncated: 17 more columns]

## Sheet: Appendix S3
Table S3-1 The mutations distribution in the plastid genome sequences of Lindera species							Table S3-2 The Indel distribution in the plastid genome sequences of Lindera species
Contig site	mutation site 1	mutation site 2	mutation site 3	Regions			Position site	Individual	Indel length (bp)
1	7g	3t		LSC			196	8	1
6	2a	8g		LSC			221	4	1
99	9c	1t		LSC			1760	7	1
142	1g	9t		LSC			4602	8	1
232	9a	1g		LSC			4603	3	1
250	8a	2t		LSC			5134	8	1
251	8g	2t		LSC			5135	7	1
252	2c	8g		LSC			5136	6	4
253	9a	1c		LSC			5197	6	7
254	9a	1t		LSC			5584	6	1
260	1a	9c		LSC			5585	8	1
271	9a	1g		LSC			5609	6	1
296	1a	9g		LSC			5610	7	1
342	1a	9g		LSC			5611	8	2
359	1a	9t		LSC			5613	7	1
434	6a	4g		LSC			5614	6	6
435	6a	4t		LSC			5986	7	1
437	6a	4c		LSC			5988	6	4
438	6g	4t		LSC			7075	3	12
440	6a	4t		LSC			7295	7	1
441	6c	4t		LSC			7982	7	1
486	1a	9c		LSC			8861	6	1
500	1a	9g		LSC			8862	7	1
812	1a	9g		LSC			8863	6	2
950	1c	9t		LSC			9620	3	1
953	9a	1g		LSC			9947	3	1
1088	9a	1t		LSC			10597	3	1
1475	1a	9g		LSC			10598	2	2
1667	1a	9g		LSC			10704	2	1
1685	9a	1g		LSC			11020	3	5
1882	7a	3c		LSC			11025	2	1
2028	9a	1c		LSC			11438	3	5
2179	9g	1t		LSC			13069	8	3
2182	1g	9t		LSC			13077	5	1
2335	1c	9t		LSC			13773	8	1
2905	7a	3g		LSC			14181	3	1
2910	2g	8t		LSC			14182	7	1
2972	9a	1g		LSC			14183	2	1
3193	1a	9g		LSC			15183	8	1
3213	1a	9g		LSC			15184	5	2
3322	7a	3c		LSC			15186	3	10
3369	9g	1t		LSC			15196	2	1
3370	9c	1t		LSC			15346	8	10
3474	1c	9t		LSC			16636	2	20
3587	9c	1t		LSC			17483	7	1
4130	8a	2g		LSC			17484	6	1
4175	9c	1t		LSC			17648	8	1
4202	1a	9t		LSC			24102	8	1
4438	9a	1g		LSC			24103	2	2
4457	9c	1t		LSC			28155	3	1
4569	9a	1c		LSC			28848	3	1
4581	8g	2t		LSC			29099	7	1
4590	1a	9g		LSC			30006	3	1
4622	9c	1t		LSC			30696	6	1
4811	9c	1t		LSC			30699	2	1
4840	1a	9c		LSC			32122	3	1
4903	3c	7t		LSC			32123	6	1
5076	1c	9t		LSC			32184	2	15
5102	9c	1t		LSC			32851	7	1
5104	1a	9g		LSC			32853	6	1
5199	6-	3c	1t	LSC			32854	2	2
5200	6-	1c	3t	LSC			33522	5	1
5548	1a	9g		LSC			33523	8	1
5596	9g	1t		LSC			33528	8	1
5606	9c	1t		LSC			33529	2	1
5793	2a	8g		LSC			34300	3	1
5880	3a	7g		LSC			34751	4	1
6180	9a	1g		LSC			34819	2	1
6231	3g	7t		LSC			37898	7	5
6392	1c	9t		LSC			39102	8	5
6481	9c	1t		LSC			39159	7	1
6618	1a	9t		LSC			39160	3	1
6732	9a	1g		LSC			45251	5	1
6831	3a	7g		LSC			46792	5	1
7162	9a	1c		LSC			46793	2	1
7239	7g	3t		LSC			47596	2	1
7284	9c	1t		LSC			48073	4	1
7484	9a	1g		LSC			48074	5	1
7605	9g	1t		LSC			49394	5	1
7773	9g	1t		LSC			49395	2	1
7972	1c	9t		LSC			49584	8	10
8052	8a	2g		LSC			49605	2	9
8094	9c	1g		LSC			49632	8	1
8202	9a	1t		LSC			50786	8	1
8326	1a	9g		LSC			51001	2	5
8376	1a	9c		LSC			51024	2	13
8490	1a	9t		LSC			53345	3	1
8498	1a	9t		LSC			53417	6	1
8499	1a	9t		LSC			53418	5	1
8507	1a	9t		LSC			54924	5	1
8616	2c	8t		LSC			55801	8	1
8634	7c	3t		LSC			55802	3	1
8652	1c	9t		LSC			55803	2	1
8663	9c	1t		LSC			55868	8	1
8680	1c	9t		LSC			58353	3	6
8691	3a	7c		LSC			64733	8	1
8937	7a	3g		LSC			64734	5	1
9112	3c	7t		LSC			64735	3	1
9144	9c	1t		LSC			66938	8	1
9328	1c	9t		LSC			66941	3	1
9403	1g	9t		LSC			67344	2	2
9725	1a	9g		LSC			67353	3	1
9950	1a	1c	8t	LSC			69096	4	1
10059	1g	9t		LSC			69751	8	2
10081	9a	1g		LSC			72455	8	1
10147	9c	1t		LSC			72456	7	1
10318	9c	1t		LSC			73141	8	1
10498	9a	1g		LSC			73142	3	1
10808	2g	8t		LSC			73143	2	2
10809	1a	9c		LSC			74351	8	1
10818	8a	2g		LSC			74352	6	1
10834	1a	9c		LSC			74561	4	1
10962	9g	1t		LSC			74562	2	1
11002	1a	9g		LSC			75237	4	1
11013	1a	9t		LSC			75553	5	1
11017	7g	3t		LSC			75554	6	1
11034	1g	9t		LSC			75556	2	1
11204	1a	9c		LSC			79328	8	1
11296	1a	9c		LSC			84531	7	1
11467	1a	9g		LSC			84532	4	1
11484	9c	1g		LSC			85032	2	1
11485	9a	1g		LSC			85039	8	1
11502	9g	1t		LSC			86351	8	1
12155	9c	1t		LSC			86600	7	2
12302	8a	2g		LSC			86602	8	1
12344	1c	9t		LSC			88197	8	1
12359	1a	9g		LSC			89774	4	1
13077	3a	7g		LSC			89775	3	1
13141	7a	3g		LSC			95431	8	23
13315	1a	9c		LSC			95454	7	1
13801	9a	1c		LSC			116629	6	1
14010	1a	9g		LSC			116630	4	1
14348	1c	9t		LSC			117235	2	2
14395	1a	9g		LSC			117256	5	19
14406	1a	9c		LSC			117435	8	1
14450	1-	7c	2t	LSC			118055	5	1
14637	1a	9c		LSC			118056	7	2
14677	1a	9g		LSC			118058	8	1
14722	1c	9g		LSC			118059	2	1
15198	1-	2a	7g	LSC			118194	8	1
15201	3a	7c		LSC			118198	4	1
15312	9c	1t		LSC			118199	2	1
15340	1c	9t		LSC			118462	8	2
15377	1a	9g		LSC			118464	6	1
15387	2c	8t		LSC			118465	2	1
15459	9a	1g		LSC			119025	7	1
15563	3c	7t		LSC			119437	6	1
15591	9c	1t		LSC			119438	2	1
15627	9a	1g		LSC			120554	5	1
15653	9c	1t		LSC			123959	8	1
15679	1g	9t		LSC			123960	4	1
15798	9c	1t		LSC			125886	2	1
16337	9c	1t		LSC			128630	8	1
16350	3c	7t		LSC			128783	8	13
16546	9a	1g		LSC			131061	3	6
16577	9c	1t		LSC			151938	8	24
16587	9c	1t		LSC
16727	9c	1t		LSC
16791	1a	9g		LSC
16974	1a	9g		LSC
17179	1a	9t		LSC
17180	1a	9g		LSC
17475	9c	1t		LSC
17484	7-	1c	2t	LSC
17486	1c	9t		LSC
17647	1c	9t		LSC
17695	9a	1g		LSC
17711	8a	2g		LSC
17720	3a	7c		LSC
17737	4a	6c		LSC
17801	1g	9t		LSC
17819	9g	1t		LSC
18062	1c	9t		LSC
18823	1c	9t		LSC
18886	1c	9t		LSC
19025	9a	1g		LSC
19081	9a	1g		LSC
19121	1a	9g		LSC
19138	1c	9t		LSC
19206	1c	9t		LSC
19551	6a	4c		LSC
19589	1c	9t		LSC
19829	1c	9t		LSC
19901	1g	9t		LSC
19943	1g	9t		LSC
20143	9g	1t		LSC
20214	1c	9t		LSC
20524	1g	9t		LSC
20564	1c	9t		LSC
20735	9g	1t		LSC
20995	9g	1t		LSC
21371	1c	9t		LSC
21572	7a	3g		LSC
21890	9c	1t		LSC
21987	1a	9g		LSC
22190	1c	9t		LSC
22625	1a	9g		LSC
23256	9c	1t		LSC
23478	8c	2t		LSC
23712	1g	9t		LSC
23815	1a	9c		LSC
23986	9c	1t		LSC
23994	9c	1t		LSC
25498	1g	9t		LSC
25894	1a	9g		LSC
26053	9a	1g		LSC
26506	9c	1t		LSC
26596	1a	9c		LSC
26728	1c	9t		LSC
27173	9c	1t		LSC
27862	3a	7c		LSC
27970	9c	1t		LSC
28079	9c	1t		LSC
28281	1a	9g		LSC
28344	1a	9g		LSC
28449	9c	1t		LSC
28627	9c	1t		LSC
28628	8g	2t		LSC
28983	3g	7t		LSC
29123	9a	1g		LSC
29287	1a	9c		LSC
29358	9g	1t		LSC
29458	9c	1t		LSC
29604	1c	9t		LSC
29776	1g	9t		LSC
29904	1a	9g		LSC
30628	3a	7c		LSC
31146	1a	9c		LSC
31266	1a	9g		LSC
31287	9c	1t		LSC
31415	9c	1t		LSC
31730	1c	9t		LSC
31785	1a	9g		LSC
31790	1a	9c		LSC
31796	1g	9t		LSC
31832	3a	7c		LSC
31898	3a	7c		LSC
31982	9c	1t		LSC
32017	1c	9t		LSC
32030	9a	1g		LSC
32122	1-	3a	6g	LSC
32138	9c	1t		LSC
32216	7g	3t		LSC
32228	1a	9g		LSC
32260	1c	9t		LSC
32299	9a	1g		LSC
32317	1a	9g		LSC
32496	2c	8t		LSC
32519	9c	1t		LSC
32890	1c	9t		LSC
32906	1a	9g		LSC
33234	9a	1c		LSC
33272	9c	1t		LSC
33311	1c	9t		LSC
33325	1a	9g		LSC
33341	9a	1g		LSC
33357	1a	9g		LSC
33377	1c	9t		LSC
33431	1g	9t		LSC
33551	2a	8c		LSC
33568	1a	9g		LSC
33599	9c	1t		LSC
33665	1c	9t		LSC
33753	1a	9c		LSC
33883	1a	9g		LSC
34085	9c	1t		LSC
34112	1a	9g		LSC
34190	9a	1g		LSC
34202	1g	9t		LSC
34527	1a	9c		LSC
34556	1a	9g		LSC
34675	1a	9g		LSC
34715	1c	9t		LSC
34776	9a	1g		LSC
34829	1g	9t		LSC
34941	3a	7c		LSC
35017	1a	9t		LSC
35054	1c	9t		LSC
35060	1a	9g		LSC
35102	9a	1g		LSC
35130	1a	9g		LSC
35182	9g	1t		LSC
35184	9a	1g		LSC
35265	1a	9g		LSC
35931	1c	9t		LSC
36859	9a	1g		LSC
36940	9c	1t		LSC
37318	1c	9t		LSC
37456	9c	1t		LSC
38016	1a	9g		LSC
38203	9a	1g		LSC
38291	9g	1t		LSC
38306	1a	9c		LSC
38338	1a	9c		LSC
38371	1g	9t		LSC
38479	9a	1g		LSC
38709	9a	1g		LSC
38772	1g	9t		LSC
38792	9c	1g		LSC
38859	9c	1t		LSC
38921	1c	9t		LSC
39159	9g	1t		LSC
39164	9a	1g		LSC
39482	9g	1t		LSC
39624	1c	9t		LSC
39713	9a	1g		LSC
39816	9c	1t		LSC
40399	9a	1g		LSC
41215	9a	1g		LSC
42337	9a	1c		LSC
42347	9a	1g		LSC
42725	1g	9t		LSC
42833	9a	1g		LSC
43937	1a	9g		LSC
44528	1c	9t		LSC
44597	1c	9t		LSC
44716	1a	9c		LSC
44717	9c	1t		LSC
44800	1a	9g		LSC
45799	3c	7t		LSC
46068	9g	1t		LSC
46295	9a	1t		LSC
46382	1a	9g		LSC
46481	9a	1c		LSC
46587	9a	1c		LSC
46602	9c	1t		LSC
46731	8c	2t		LSC
46779	7a	3t		LSC
46783	1g	9t		LSC
46854	9a	1g		LSC
47121	9a	1g		LSC
47175	3a	7c		LSC
47202	2g	8t		LSC
47230	9g	1t		LSC
47237	9g	1t		LSC
47279	1a	9c		LSC
47451	9g	1t		LSC
47468	9a	1g		LSC
47638	9a	1t		LSC
47732	9a	1g		LSC
47840	1g	9t		LSC
48001	9a	1g		LSC
48003	1g	9t		LSC
48075	5-	3a	2g	LSC
48076	8a	2g		LSC
48077	3a	7g		LSC
48078	6a	4g		LSC
48360	1g	9t		LSC
48564	1a	9g		LSC
48746	9a	1g		LSC
49384	9g	1t		LSC
49952	1a	9g		LSC
50057	1a	9g		LSC
50088	1a	9c		LSC
50472	9a	1g		LSC
50473	9g	1t		LSC
50508	1a	9c		LSC
50591	9a	1g		LSC
50759	1a	9g		LSC
50782	1g	9t		LSC
50809	1c	9t		LSC
51155	1a	9g		LSC
51267	1a	9g		LSC
51443	3a	7c		LSC
51575	1c	9t		LSC
51807	1a	9g		LSC
51859	9c	1t		LSC
51877	1g	9t		LSC
52001	9c	1t		LSC
52493	1a	9t		LSC
52520	9c	1t		LSC
52621	9c	1t		LSC
52950	1a	9g		LSC
53351	9g	1t		LSC
53383	9a	1g		LSC
53390	1a	9g		LSC
53419	5-	1c	4t	LSC
53495	9c	1t		LSC
53517	1a	9g		LSC
53800	9c	1t		LSC
53801	9a	1g		LSC
54096	9a	1c		LSC
54129	1g	9t		LSC
54130	9a	1g		LSC
54138	9a	1g		LSC
54236	1a	9t		LSC
54263	7c	3t		LSC
54274	1a	9c		LSC
54694	7c	3t		LSC
54808	3a	7c		LSC
54985	9a	1t		LSC
55056	1a	9g		LSC
55189	1a	9c		LSC
55667	1c	9t		LSC
55834	9c	1g		LSC
55836	1c	9t		LSC
55925	9c	1t		LSC
56591	2a	8c		LSC
57128	1c	9t		LSC
57428	1a	9g		LSC
57431	1g	9t		LSC
57434	1g	9t		LSC
57575	1a	9g		LSC
57854	1a	9g		LSC
58098	7a	3g		LSC
58109	3a	7g		LSC
58197	1a	9g		LSC
58529	9g	1t		LSC
58579	1c	9t		LSC
58680	9c	1t		LSC
58703	2a	8c		LSC
59290	8g	2t		LSC
59364	2c	8t		LSC
59611	1a	9g		LSC
59661	1c	9t		LSC
59664	2a	8g		LSC
59844	1a	9t		LSC
59981	2c	8g		LSC
60456	9c	1t		LSC
60475	9a	1c		LSC
60503	9a	1g		LSC
60580	9c	1t		LSC
60589	1c	9t		LSC
60610	2g	8t		LSC
60670	9g	1t		LSC
60900	9a	1g		LSC
61024	8a	2c		LSC
61263	1a	9c		LSC
61266	1c	9t		LSC
61356	9g	1t		LSC
61393	9c	1t		LSC
61540	9c	1t		LSC
61615	8a	2g		LSC
62494	9c	1t		LSC
62541	3a	7c		LSC
62955	2c	8t		LSC
62997	7c	3t		LSC
63057	7a	3c		LSC
63058	3a	7g		LSC
63080	9a	1g		LSC
63171	1g	9t		LSC
63207	3g	7t		LSC
63328	9a	1c		LSC
63562	1a	9c		LSC
63563	1c	9t		LSC
63684	9a	1c		LSC
63787	9a	1c		LSC
63873	9g	1t		LSC
64364	9a	1g		LSC
64404	9c	1g		LSC
64546	7a	3c		LSC
64565	9c	1t		LSC
65335	1c	9t		LSC
65359	9a	1c		LSC
65398	9a	1g		LSC
65407	9a	1g		LSC
65594	1c	9t		LSC
65620	1c	9t		LSC
65773	9a	1g		LSC
65892	9a	1g		LSC
66293	7g	3t		LSC
66832	1c	9t		LSC
66870	7a	3c		LSC
66939	8-	1c	1t	LSC
66942	3-	1c	6t	LSC
66943	1c	9t		LSC
66971	7c	3t		LSC
67002	1c	9t		LSC
67101	9a	1g		LSC
67132	9c	1t		LSC
67162	4g	6t		LSC
67163	4g	6t		LSC
67164	4a	6c		LSC
67165	4a	6c		LSC
67324	1c	9g		LSC
67357	8g	2t		LSC
67358	9a	1c		LSC
67371	1a	9g		LSC
67391	9g	1t		LSC
67465	1g	9t		LSC
67466	2a	8c		LSC
67619	1a	9g		LSC
67649	9a	1c		LSC
67683	1c	9t		LSC
67741	1c	9t		LSC
67812	2c	8t		LSC
67814	2g	8t		LSC
67815	2a	8t		LSC
67816	2a	8t		LSC
67817	8g	2t		LSC
67818	2c	8t		LSC
67819	2a	8c		LSC
67820	2g	8t		LSC
67821	2a	8g		LSC
67822	8a	2c		LSC
67823	2a	8t		LSC
67824	2a	8t		LSC
67825	2a	8c		LSC
67827	2a	8g		LSC
67917	8g	2t		LSC
67951	7a	3g		LSC
68116	1-	2c	7t	LSC
68455	9a	1g		LSC
68632	9a	1g		LSC
68687	9a	1c		LSC
69073	9c	1t		LSC
69074	1c	9t		LSC
69094	7g	3t		LSC
69099	1c	9t		LSC
69495	9a	1g		LSC
69523	1c	9t		LSC
69557	1a	9c		LSC
69769	1a	9t		LSC
69868	9a	1g		LSC
69880	7c	3t		LSC
69972	2c	8t		LSC
70091	9c	1g		LSC
70123	8c	2t		LSC
70817	9c	1t		LSC
70839	1c	9t		LSC
70917	1a	9g		LSC
71378	1a	9g		LSC
71418	9a	1g		LSC
71583	1a	9g		LSC
71599	1a	9g		LSC
72043	1a	9c		LSC
72108	9a	1g		LSC
72144	2c	8t		LSC
72261	7g	3t		LSC
72267	2c	8t		LSC
72270	9g	1t		LSC
72280	1a	9g		LSC
72415	1a	9g		LSC
72510	9c	1t		LSC
72608	9c	1t		LSC
72713	1a	9g		LSC
72738	9c	1t		LSC
72877	9c	1t		LSC
73120	9g	1t		LSC
73129	1a	9g		LSC
73405	9a	1g		LSC
73437	1a	9g		LSC
73588	9c	1t		LSC
73955	3g	7t		LSC
73972	9c	1t		LSC
74031	9g	1t		LSC
74159	9c	1t		LSC
74250	1c	9t		LSC
74442	9c	1t		LSC
74735	1g	9t		LSC
74738	1g	9t		LSC
75345	9a	1c		LSC
75352	9g	1t		LSC
75485	9a	1g		LSC
75749	9c	1t		LSC
76012	9a	1c		LSC
76025	7g	3t		LSC
76035	1a	9t		LSC
76372	1a	9c		LSC
77322	9c	1t		LSC
77366	7c	3t		LSC
77969	9c	1t		LSC
78221	7g	3t		LSC
78948	1g	9t		LSC
79660	2c	8t		LSC
79788	9a	1g		LSC
79918	1c	9t		LSC
80004	9a	1g		LSC
80552	9g	1t		LSC
80711	9a	1g		LSC
81263	9c	1t		LSC
81394	9a	1g		LSC
81398	9c	1t		LSC
81968	9g	1t		LSC
81981	1g	9t		LSC
81982	9a	1c		LSC
81983	1a	9t		LSC
81984	9g	1t		LSC
81985	1a	9c		LSC
81993	1c	9t		LSC
82082	9a	1g		LSC
82210	1a	9t		LSC
82446	1a	9g		LSC
82585	1c	9t		LSC
82721	9c	1t		LSC
82758	1c	9t		LSC
82986	9a	1c		LSC
83036	1c	9t		LSC
83216	9c	1t		LSC
83450	9a	1c		LSC
83606	1g	9t		LSC
83875	9c	1t		LSC
83948	9a	1c		LSC
84101	1c	9t		LSC
84401	9c	1t		LSC
84650	1c	9t		LSC
85208	9g	1t		LSC
85209	9a	1c		LSC
85411	1c	9t		LSC
85732	1g	9t		LSC
85754	9c	1t		LSC
85782	3a	7c		LSC
86091	9c	1t		LSC
86183	9a	1g		LSC
86560	9g	1t		LSC
86602	7-	2c	1t	LSC
86605	1a	9t		LSC
86614	1a	9t		LSC
86879	1a	9g		LSC
86906	1c	9t		LSC
87203	9a	1c		LSC
87376	9c	1t		LSC
87377	1c	9t		LSC
87383	9a	1c		LSC
87385	9a	1c		LSC
87387	9a	1c		LSC
87391	1c	9t		LSC
87416	1c	9t		LSC
87422	9g	1t		LSC
87701	1g	9t		LSC
88038	1a	9g		LSC
88198	8-	1c	1t	LSC
88321	9c	1t		LSC
88422	1g	9t		LSC
88527	1a	9g		LSC
88718	1a	9c		LSC
88924	7a	3g		LSC
89162	9g	1t		LSC
89201	9a	1g		LSC
89472	9a	1g		LSC
89574	1g	9t		LSC
89783	1c	9t		LSC
89784	2c	8t		LSC
89785	1c	9t		LSC
89786	1-	5c	4t	LSC
89787	1-	1c	8t	LSC
89806	9a	1c		LSC
89807	1g	9t		LSC
89869	1c	9t		LSC
90066	9c	1t		LSC
90163	9a	1c		LSC
90506	1a	9g		LSC
90679	1a	9g		LSC
90773	9c	1t		LSC
90911	1g	9t		LSC
90972	9c	1t		LSC
90986	1c	9t		LSC
91088	1c	9t		LSC
91106	9c	1t		LSC
91237	1a	9g		LSC
91505	2c	8t		LSC
91601	1c	9t		LSC
91630	1c	9t		LSC
91642	9c	1t		LSC
91740	8a	2c		LSC
91774	9c	1t		LSC
91834	1c	9t		LSC
91918	9c	1t		LSC
92150	1c	9t		LSC
92152	2a	8c		LSC
92389	9c	1t		LSC
92394	1c	9t		LSC
92491	1a	9c		LSC
92498	9a	1t		LSC
92529	1a	9g		LSC
92532	1a	9g		LSC
92799	9a	1c		LSC
92805	9a	1c		LSC
92917	3g	7t		LSC
93021	9c	1t		LSC
93048	1c	9t		LSC
93263	1c	9t		LSC
93360	1a	9c		LSC
93361	7c	3t		LSC
93374	1c	9t		LSC
93504	1a	9g		LSC
93540	2a	8g		LSC
93563	1c	9t		LSC
93634	9c	1t		LSC
93658	7a	3g		LSC
93793	9g	1t		LSC
93869	9a	1g		LSC
93871	9a	1g		LSC
94018	1g	9t		LSC
95116	3a	7c		IR
95430	9a	1c		IR
95455	7-	1g	2t	IR
95915	1a	9c		IR
96152	1c	9t		IR
96342	1g	9t		IR
96900	2c	8t		IR
97045	9c	1t		IR
99089	9a	1c		IR
99487	1c	9t		IR
99654	9c	1t		IR
99773	9a	1g		IR
100416	1c	9t		IR
100740	1g	9t		IR
102413	1a	9g		IR
102514	9a	1c		IR
102551	1g	9t		IR
103294	9a	1g		IR
105907	1c	9t		IR
106709	1c	9t		IR
107255	1a	9g		IR
111250	9c	1t		IR
111897	3a	7c		IR
111908	9a	1g		IR
111913	9a	1t		IR
113364	9a	1t		IR
114309	1c	9t		IR
114333	1g	9t		IR
114384	9c	1t		IR
114403	9a	1g		IR
114505	8c	2t		IR
114522	2a	8c		IR
114576	1g	9t		IR
114692	9c	1t		IR
114714	9a	1g		IR
114747	1c	9t		IR
114752	9c	1t		IR
114757	1c	9t		IR
114758	9c	1t		IR
114798	1c	9g		IR
114813	9a	1g		IR
114816	1c	9t		IR
114870	9a	1c		IR
114875	3a	7c		IR
114878	1c	9t		IR
114879	9c	1g		IR
114885	1a	9g		IR
114894	1c	9g		IR
114895	9a	1t		IR
115049	9c	1t		SSC
115054	8c	2t		SSC
115072	1a	9g		SSC
115087	1c	9t		SSC
115137	9c	1t		SSC
115665	3a	7g		SSC
115764	3a	7g		SSC
115782	9a	1g		SSC
115809	1a	9g		SSC
115814	7c	3t		SSC
116184	1a	9g		SSC
116196	1a	9g		SSC
116350	1c	9t		SSC
116459	1c	9t		SSC
116523	9a	1g		SSC
116529	1g	9t		SSC
116532	1-	1a	8t	SSC
116640	9a	1c		SSC
116665	3a	7c		SSC
116669	1c	9t		SSC
116696	1a	9g		SSC
116755	9a	1t		SSC
116839	9a	1t		SSC
116871	1a	9g		SSC
116887	1a	9g		SSC
116908	9a	1c		SSC
116964	1c	9t		SSC
117019	9a	1g		SSC
117114	8a	2t		SSC
117165	9c	1t		SSC
117243	1g	9t		SSC
117306	1a	9t		SSC
117352	1a	9g		SSC
117400	1a	9t		SSC
117403	9c	1t		SSC
117428	9a	1g		SSC
117496	1c	9t		SSC
117518	9a	1c		SSC
117683	9c	1t		SSC
117890	9a	1g		SSC
117915	1g	9t		SSC
118069	9a	1t		SSC
118077	1a	9g		SSC
118101	1a	9g		SSC
118195	8-	1g	1t	SSC
118272	1a	9t		SSC
118288	1a	9g		SSC
118304	1a	9g		SSC
118336	1a	9g		SSC
118346	1a	9g		SSC
118476	1a	9g		SSC
118482	2g	8t		SSC
118521	9c	1t		SSC
118531	1a	9g		SSC
118625	3a	7c		SSC
118681	8a	2c		SSC
118831	9a	1c		SSC
118834	1c	9t		SSC
118866	1a	9g		SSC
118880	1a	9c		SSC
118936	9a	1c		SSC
119034	9a	1g		SSC
119183	9c	1t		SSC
119215	1c	9t		SSC
119386	8c	2t		SSC
119398	7a	3c		SSC
119403	1a	9c		SSC
119437	1c	9t		SSC
119441	9a	1t		SSC
119582	9c	1g		SSC
119740	9g	1t		SSC
119954	9a	1c		SSC
120019	9a	1g		SSC
120118	9c	1t		SSC
120171	1c	9t		SSC
120423	9a	1g		SSC
120426	1a	9g		SSC
120438	9c	1t		SSC
120496	5a	5c		SSC
120497	5g	5t		SSC
120498	5a	5t		SSC
120499	5a	5c		SSC
120500	5g	5t		SSC
120603	9a	1g		SSC
120625	7g	3t		SSC
120805	1c	9t		SSC
120830	9c	1t		SSC
120909	2a	8c		SSC
121079	9g	1t		SSC
121474	9a	1g		SSC
121575	9a	1g		SSC
121667	9g	1t		SSC
121674	9c	1t		SSC
121902	1a	9g		SSC
122051	9g	1t		SSC
122055	9c	1t		SSC
122079	9a	1g		SSC
122337	1c	9t		SSC
122642	1c	9t		SSC
122644	3a	7c		SSC
122648	3c	7t		SSC
122718	9c	1t		SSC
122963	1c	9t		SSC
123143	7a	3g		SSC
123191	1a	9g		SSC
123260	1a	9g		SSC
123299	9c	1t		SSC
123707	1c	9t		SSC
123903	1g	9t		SSC
124121	9a	1c		SSC
124124	9a	1g		SSC
124130	9c	1g		SSC
124133	1c	9t		SSC
124160	9c	1t		SSC
124465	9a	1g		SSC
124480	1c	9t		SSC
124778	9a	1t		SSC
124829	9a	1c		SSC
125035	1a	9c		SSC
125086	9g	1t		SSC
125128	9a	1g		SSC
125158	3a	7g		SSC
125461	1c	9t		SSC
125466	3a	7c		SSC
125526	9a	1g		SSC
125545	9a	1g		SSC
125577	3a	7c		SSC
125735	1a	9c		SSC
125905	8a	2c		SSC
125969	1a	9g		SSC
126064	9a	1g		SSC
126126	3a	7c		SSC
126254	1c	9t		SSC
126344	9a	1c		SSC
126411	2a	8g		SSC
126462	1a	9g		SSC
126577	1a	9g		SSC
126616	1c	9t		SSC
127118	9c	1t		SSC
127279	9c	1t		SSC
127550	9g	1t		SSC
127850	1c	9t		SSC
127856	1a	9g		SSC
127909	1a	9g		SSC
128225	9a	1g		SSC
128327	1a	9t		SSC
128331	1c	9t		SSC
128374	1a	9g		SSC
128476	9c	1t		SSC
128772	1-	1c	8t	SSC
128782	9g	1t		SSC
128788	8-	1a	1t	SSC
128794	8-	1a	1c	SSC
128909	1c	9t		SSC
129150	9a	1g		SSC
129201	3c	7t		SSC
129228	1c	9g		SSC
129347	9g	1t		SSC
129422	9c	1t		SSC
129543	1c	9t		SSC
129862	9a	1g		SSC
129955	3c	7t		SSC
129956	1a	9g		SSC
129971	9g	1t		SSC
130110	1c	9t		SSC
130251	1c	9t		SSC
130363	1a	9t		SSC
130375	7a	3g		SSC
130436	1c	9t		SSC
130451	1a	9g		SSC
130580	1c	9t		SSC
130727	7c	3t		SSC
130767	9a	1g		SSC
130862	1c	9t		SSC
130945	1a	9t		SSC
131020	9g	1t		SSC
131047	1c	9t		SSC
131076	3c	7t		SSC
131087	1g	9t		SSC
131088	8a	2c		SSC
131091	1c	9t		SSC
131095	1c	9t		SSC
131124	7a	3t		SSC
131154	1a	9g		SSC
131204	9c	1t		SSC
131244	1c	9g		SSC
131350	1c	9t		SSC
131393	1a	9g		SSC
131518	3c	7t		SSC
131526	1c	9t		SSC
131572	9c	1t		SSC
131674	9a	1g		SSC
131713	1a	9t		SSC
131719	1c	9g		SSC
132170	1a	9g		SSC
132198	9c	1t		SSC
132306	8c	2t		SSC
132349	1a	9c		SSC
132363	1a	9t		SSC
132413	1c	9t		SSC
132486	9a	1g		SSC
132531	9c	1t		SSC
132609	1a	9c		SSC
132705	9c	1t		SSC
132756	9a	1g		SSC
132780	8a	2c		SSC
132794	9g	1t		SSC
132802	9g	1t		SSC
132803	3g	7t		SSC
132844	9g	1t		SSC
132866	1c	9t		SSC
132897	1a	9t		SSC
132904	9a	1t		SSC
132912	9a	1c		SSC
132921	1g	9t		SSC
132933	9c	1t		SSC
132995	9g	1t		SSC
133075	9c	1t		SSC
133110	9a	1g		SSC
133119	9c	1t		SSC
133120	9a	1g		SSC
133128	9g	1t		SSC
133188	7a	3g		SSC
133217	2a	1c	7t	SSC
133218	2g	8t		SSC
133220	2a	1c	7t	SSC
134035	1a	9t		IR
135486	1a	9t		IR
135491	1c	9t		IR
135502	7g	3t		IR
136149	1a	9g		IR
140144	9c	1t		IR
140690	9a	1g		IR
141492	9a	1g		IR
144105	1c	9t		IR
144848	9a	1c		IR
144885	1g	9t		IR
144986	9c	1t		IR
146659	9a	1c		IR
146983	9a	1g		IR
147626	1c	9t		IR
147745	1a	9g		IR
147912	9a	1g		IR
148310	1g	9t		IR
150354	1a	9g		IR
150499	8a	2g		IR
151057	9a	1c		IR
151247	9a	1g		IR
151484	9g	1t		IR
152283	7g	3t		IR
